# Supplementary material
Source: publisher figshare collection journal article supplement (https://gsajournals.figshare.com/ndownloader/files/13448516)
Supplement: Supplementary file 1 [file 13448516]

## Sheet: articles
Year	Title	# of Authors	# of Male Auth	# of Female Auth	# of Programmers	# of Male Prog	# of Female Prog	Programmer Names	Citations
1970	Species Packing and Competitive Equilibrium for Many Species	1	1	0	0	0	0	NA	714
1970	Probabilistic Fertility Models of the Life Table Type	1	1	0	0	0	0	NA	72
1970	Linkage and Selection: Two Locus Symmetric Viability Model	2	2	0	0	0	0	NA	178
1970	The Effect of Linkage in a Finite Random-Mating Population	1	1	0	1	0	1	Mrs. H. Walker	34
1970	On the Evolutionary Effect of Recombination	2	2	0	0	0	0	NA	170
1970	On the Rate of Decrease of Heterozygosity in Circular Stepping Stone Models of Population	1	1	0	0	0	0	NA	66
1970	Some Optimum Problems in Individual Selection	1	1	0	0	0	0	NA	40
1970	Remarks on the Substitutional Load	1	1	0	0	0	0	NA	16
1970	A Mathematical Model for Interaction of Gene Frequency in a Parasite and Its Host	1	1	0	0	0	0	NA	121
1970	The Origin of Male Haploid Genetic Systems and Their Expected Sex Ratio	2	2	0	0	0	0	NA	112
1970	Ergodic Properties of Populations I: The One Sex Model	1	1	0	0	0	0	NA	69
1970	On Simple Approximate Calculations Appropriate to Populations with Random Growth Rates	1	1	0	0	0	0	NA	12
1970	Change of Fitness by Selection for a Quantitative Character	1	1	0	0	0	0	NA	56
1970	On the Equivalence of Random Mating and Random Union of Gametes Models in Finite, Monoecious Populations	1	1	0	0	0	0	NA	17
1970	Births Averted by Contraception: An Approach Through Renewal Theory	1	1	0	1	0	1	Barbara McCann	27
1970	Effective Number of Alleles in a Subdivided Population	1	1	0	0	0	0	NA	232
1970	A General Investigation into the Mortality and Multiplication of the Human Species	3	2	1	0	0	0	NA	65
1970	Malthusian Parameters in Genetic Populations. I. Haploid and Selfing Models	2	2	0	0	0	0	NA	28
1970	The Birth Trajectory Corresponding to Particular Population Sequences	1	1	0	0	0	0	NA	4
1970	Selection in Populations with Overlapping Generations. I. The Use of Malthusian Parameters in Population Genetics	1	1	0	0	0	0	NA	124
1970	On Quasilinkage Equilibrium and the Fundamental Theorem of Natural Selection	2	2	0	0	0	0	NA	22
1971	Vito Volterra and Theoretical Ecology	1	1	0	0	0	0	NA	135
1971	The Survival of Recessive Lethals in Finite Population	2	2	0	0	0	0	NA	24
1971	Estimators for Viability in Experimental Populations, their Variances and Covariances	1	1	0	0	0	0	NA	4
1971	On Mutation Selection Balance for Two-Locus Haploid and Diploid Populations	2	2	0	0	0	0	NA	36
1971	Theoretical Studies on the Use of Translocations for the Control of Tsetse Flies and Other Disease Vectors	2	2	0	2	1	1	Mr. J. Robinson and Miss E.P. Bennett	55
1971	Effect of Exclusion of Sib-Mating on Genetic Drift	1	1	0	0	0	0	NA	19
1971	Equilibre et Croissance de Populations Soumises a' des Migrations	1	1	0	0	0	0	NA	46
1971	Comment on a Proposition of H.Le Bras	1	1	0	0	0	0	NA	9
1971	Linkage Disequilibrium and Homozygosity of Chromosome Segments in Finite Populations.	1	1	0	0	0	0	NA	398
1971	Finch Flocks in the Mojave Desert	1	1	0	0	0	0	NA	2
1971	The Distribution and Comparison of "Genetic Loads" Under Heterotic Selection and Simple Frequency- Dependent Selection in Finite Populations.	1	1	0	0	0	0	NA	19
1971	Theoretical Foundation of Population Genetics at the Molecular Level	1	1	0	0	0	0	NA	185
1971	On Evolution in a Population with an Infinite Number of Types	1	1	0	0	0	0	NA	33
1971	A Model Incorporating Energy Utilization for the Dynamics of Single Species Population	2	2	0	0	0	0	NA	5
1971	The Estimation of Parameters from Populations Data on the General Stochastic Epidemic	2	2	0	0	0	0	NA	31
1971	On the Shannon-Weaver Index of Diversity, in Relation to the Distribution of Species in Bird Censuses	1	1	0	0	0	0	NA	31
1971	On the Shannon-Weaver Index of Diversity, in Relation to the Distribution of Species in Bird Censuses	2	2	0	0	0	0	NA	31
1971	Equilibrium Studies of Two Locus Haploid Populations with Recombination	1	1	0	0	0	0	NA	41
1971	On the interpretation of the Maternity Function as a Probability density	1	1	0	0	0	0	NA	7
1971	Pedigree Probability Calculus by Means of Linear Operators	1	1	0	0	0	0	NA	1
1971	On the Sensitivity of the Intrinsic Growth Rate to Changes in the Age-Specific Birth and Death Rates	1	1	0	0	0	0	NA	80
1971	Malthusian Parameters in Genetic Populations Part II. Random Mating Populations in Infinited Habitats	2	2	0	2	2	0	Professor B.D.H. Latter; Dr. E. N. West	23
1971	The Rate of Loss of Multiple Alleles in Finited Haploid Populations	1	1	0	0	0	0	NA	60
1971	A Necessary Condition for Equilibrium in Systems Exhibiting Self-Incompatible Mating	1	1	0	0	0	0	NA	19
1971	Extinction Time of Deleterious Mutant Genes in Large Populations	1	1	0	0	0	0	NA	21
1971	Total Number of Individuals Affected by a Single Deleterious Mutation in Large Populations	1	1	0	0	0	0	NA	16
1971	Some Further Remarks "on Testing Hypotheses Concerning Standardized Molarity Ratios	1	1	0	0	0	0	NA	5
1971	The Number of Neutral Alleles Maintained in a finite, Geo-graphically structured Population	2	2	0	0	0	0	NA	31
1971	On the Interpretation of Certain Vital Rates as Averages of Underlying Forces of Transition	1	1	0	0	0	0	NA	10
1971	The Evolutionary Advantages of Sexual Dimorphism	1	1	0	0	0	0	NA	17
1971	The Evolution of Dominance: A Direct Approach Through the Theory of Linkage and Selection	2	2	0	0	0	0	NA	42
1971	Evolution of Dimorphism in a Predator-Prey Model	1	1	0	0	0	0	NA	20
1971	Bioassay of Kinship	4	2	2	0	0	0	NA	170
1972	Distribution of Birth Intervals According to the Sampling Frame	2	0	2	0	0	0	NA	35
1972	Probabiliyu of Fixation of Genes in Population of Variable Sizes	1	1	0	0	0	0	NA	6
1972	Models of Poupulation Genetics of Batesian Mimicry	2	2	0	0	0	0	NA	17
1972	Births Averted by Induced Abortion: An Application of Renewal Theory	1	1	0	2	0	2	Barbara McCann and Joan Kieper	15
1972	The Sampling Theory of Selectivity Neutral Alleles	1	1	0	0	0	0	NA	2077
1972	Addenum to a Paper of W.Ewens	2	2	0	0	0	0	NA	144
1972	Markov Population Processes as Models of Primate Social and Population Dymanics	1	1	0	0	0	0	NA	51
1972	Nuptiality	1	1	0	0	0	0	NA	60
1972	Concept of Substitutional Load in Finite Populations	1	1	0	0	0	0	NA	7
1972	Interrelations Between Death Rates and Birth Rates	1	1	0	0	0	0	NA	17
1972	Applications of Methods of Small Parameters to Multi-Niche Population Genetic Models	2	2	0	0	0	0	NA	158
1972	Polymorphisms for Genetic and Ecological Systems with Weak Coupling	2	2	0	0	0	0	NA	165
1972	The Effects of Stochastic Environments of Allele Frequencies in Natural Populations	1	1	0	0	0	0	NA	60
1972	Linearization of Crossing-Over and Mutation in a Finite Random-Mating Population	2	2	0	0	0	0	NA	12
1972	On the Neighbor Effects and the Evolution of Altruistic Traits	1	1	0	0	0	0	NA	239
1972	Effective Size of Populatios with Overlapping Generations	1	1	0	0	0	0	NA	296
1972	Can There be More Predators Than Prey	2	2	0	0	0	0	NA	83
1972	A Study of a Malthusian Parameter in Relation to some Stochastic Models of Human Reproduction	1	1	0	0	0	0	NA	13
1972	Selection for Linkage Modification: I. Random Mating Populations	1	1	0	0	0	0	NA	167
1972	Some Host Parasite Genetic Interaction Models	1	1	0	0	0	0	NA	27
1972	On Two-Sex Models Leading to Stable Populations	1	1	0	0	0	0	NA	43
1972	Selection in Populations with Overlapping Generations. III. Conditions for Genetic Equilibrium	1	1	0	0	0	0	NA	47
1972	A Note on a First Passage Probability Found in Population Genetic Models	2	2	0	1	1	0	Mr. M. Legg	2
1972	On the Extinction of a Colonizing Species	2	1	1	0	0	0	NA	322
1972	Theoretical and Simulation Results Relating to the Neutral Allele Theory	2	2	0	0	0	0	NA	17
1972	On the Probability Distribution of Some Stochastic Epidemic Models	1	0	1	0	0	0	NA	3
1972	Idenitfy of Genes by Descent Within and Between Populations Under Mutation and Migration Pressures	2	2	0	0	0	0	NA	117
1972	Generalised Selfing Series as an Experimental Design: I Theory	3	2	1	0	0	0	NA	5
1972	Heterosis at the Level of the Chromosome and at the Level of the Gene	1	1	0	0	0	0	NA	22
1972	Persistence of Variances for Stochastic, Discrete -Time, Population Growth Models	1	1	0	0	0	0	NA	10
1973	Estimation of the Age Composition of Current IUD Users: Example of Taiwan, Republic of China	3	1	2	0	0	0	NA	2
1973	Conditional Diffusion Processes in Population Genetics	1	1	0	0	0	0	NA	57
1973	On the Principle of Competitive Exclusion	1	1	0	0	0	0	NA	14
1973	Models for Cultural Inheritance 1. Group Mean and Within Group Variation	2	2	0	0	0	0	NA	252
1973	Population Growth Regulated by Intraspecific Competition for Energy or Time: Some Simple Representation	1	1	0	0	0	0	NA	191
1973	Group Selection on the Boundary of a Stable Population	2	2	0	0	0	0	NA	311
1973	Correlation and Probability Methods for One and Two Loci	2	2	0	0	0	0	NA	41
1973	Genetic Algebras and Time Continuous Models	1	1	0	0	0	0	NA	9
1973	Effect of Linkage on Behavior of Mutant Genes in Finite Populations	1	0	1	0	0	0	NA	17
1973	Balanced Polymorphisms of Quasineutral Alleles	2	2	0	0	0	0	NA	54
1973	Evolution of Dominance in Polymorphic Batesian Mimicry	1	1	0	0	0	0	NA	20
1973	Polymorphism in Random Environments	1	1	0	0	0	0	NA	166
1973	Clone Selection and the Evolution of Modifying Features	1	1	0	0	0	0	NA	32
1973	On the Hypothesis that Polymorphic Enzyme Alleles are Selectively Neutral. 1. The Evenness of Allele Frequency Distribution	2	2	0	0	0	0	NA	21
1973	Random Mating and Random Union of Gametes Models for Finite Dioecious Populations	1	0	1	0	0	0	NA	1
1973	Testing for Increased Mutation Rate for Neutral Alleles	1	1	0	0	0	0	NA	20
1973	Linkage Disequilibrium in Two-Locus, Finite, Random Mating Models Without Selection or Mutation	1	1	0	1	0	1	Mrs. M Driver	23
1973	The Effect of Lactation on the Length of the Post Partum Anovulatory Period : An Application of a Bivariate Stochastic Model	1	1	0	1	1	0	Paul Roda	20
1973	Descent Measures for Two Loci with Some Applications	2	2	0	0	0	0	NA	68
1973	Competition Between Species: Theoretical Models and Experimental Tests	3	2	1	0	0	0	NA	320
1973	Fertility Measures Based on Birth Interval Data	1	1	0	0	0	0	NA	27
1973	Estimation of the Amount of Inbreeding Due to Subdivision of a Population	2	2	0	0	0	0	NA	1
1973	A Note on Das Gupta's Two-Sex Population Model	1	1	0	0	0	0	NA	11
1973	Selection Component Analysis of Natural Polymorphisms Using Population Samples Including Mother-Offspring Combinations	2	2	0	0	0	0	NA	91
1973	Population Genetics of Modifiers of Melotic Drive 1. The Solution of a Special Case and Some General Implications	3	3	0	1	0	1	Lucy B. B. Rowe	76
1973	A Stochastic Model of Human Reproduction: Some Preliminary Results	1	1	0	0	0	0	NA	15
1974	Formation and the frequency of various Linship Relations	3	3	0	0	0	0	NA	125
1974	A Diffussion model for population growth in Random environment	2	2	0	0	0	0	NA	113
1974	Competitive release in island song sparrow populations	2	2	0	0	0	0	NA	85
1974	Towards a theory of the evolution of modifier genes	2	2	0	0	0	0	NA	162
1974	Natural selection of life history attributes: An Analytical Approach	4	4	0	0	0	0	NA	245
1974	The Evolution of Surnames: An analysis of their distribution and extinction	4	4	0	0	0	0	NA	104
1974	The Expected Changes in the Frequency of Alleles Affecting the Sex Ratio	1	1	0	0	0	0	NA	31
1974	A Simple Proof that Certain Quantities are Independent of the Geographical Structure of Population	1	1	0	0	0	0	NA	76
1974	Population Genetics of Modifiers of Meitotic Drive. II Linkage Modification in the segregation distortion sequence	2	2	0	0	0	0	NA	67
1974	Species packing and the competition function with illustrations from coral reef fish	1	1	0	0	0	0	NA	214
1974	Maintenance of Heterozygosity under the Diffusion Model	1	1	0	0	0	0	NA	2
1974	Distribution of time to fixation of neutral genes	2	2	0	0	0	0	NA	10
1974	A discrete time stochastic model of a two prey, one predator species interaction	1	1	0	0	0	0	NA	10
1974	Density dependent selection on parthenogenetic and self-mating populations	1	1	0	0	0	0	NA	11
1974	A continuous model for the study of linkage in a random-mating population	1	1	0	0	0	0	NA	0
1974	Continuous selective models	2	2	0	0	0	0	NA	90
1974	Continuous selective models with mutation and migration	2	2	0	0	0	0	NA	13
1974	On the Theroy of Niche Overlap	1	1	0	0	0	0	NA	233
1974	A model of the predator-prey relationship	1	1	0	0	0	0	NA	16
1974	A study of some diffusion models of population growth	1	1	0	0	0	0	NA	97
1974	Pearl-Reed type Stochastic Models fo Population Growth	1	1	0	0	0	0	NA	2
1974	Disequilibrium Among Several Linked Neutral Genes in Finite Population I. Mean Changes in Disequilibrium	1	1	0	1	0	1	Mrs. Jennifer Smith	28
1974	Hardy-Weinberg Equilibria in Random Mating Populations	1	1	0	0	0	0	NA	26
1974	Evolution in Finite Populations with Many Types	1	1	0	0	0	0	NA	9
1974	Some One-Dimensional Migration Models in Population Genetics Theory	2	2	0	0	0	0	NA	64
1974	An Application of the Logistic Equation to the Population Dynamics of Salt-Marsh Gastropods	4	4	0	0	0	0	NA	6
1974	Dynamics of Gene Differentiation Between Incompletely Isolated Populations of Unequal Sizes	2	2	0	0	0	0	NA	66
1974	A Strategy of Movement and Resource Utilization	2	2	0	0	0	0	NA	11
1974	Probability of Same Genotype or of Graft Compatibility Importance of the Distributtion of Gene Frequencies	2	1	1	0	0	0	NA	1
1974	Some Simulation Results for the Neutral Allele Model, with Interpreations	2	2	0	1	0	1	Diane Hollenbeck	38
1974	An Extension of the Probability Approach to Gentic Relationship: One Locus	1	1	0	0	0	0	NA	31
1974	Analysis of Some Nonrandom Mating Models	1	1	0	0	0	0	NA	16
1974	Relative-to-Relative Transition Probabilites for Two Linked Genes	1	1	0	0	0	0	NA	5
1974	Selection in Populations with Overlapping Generations VI. Rates of Change of Gene Freq. and Pop Growth Rate	1	1	0	0	0	0	NA	42
1974	Backward Population Projection by a Generalized Inverse	2	2	0	0	0	0	NA	17
1974	A Note on the Sampling Theory for Infinite Alleles and Infinite Site Models	1	1	0	0	0	0	NA	64
1974	The Inbreeding Effective Number and theEffective Number of Alleles in a Population that Varies in Size	2	2	0	0	0	0	NA	16
1974	Stable Linkage Disequilibrium without Epistasis in Subdivided Populations	2	2	0	0	0	0	NA	96
1974	Disequilibrium among Several Linked Neutral Genes in Finite Population II. Variances and Covariances of Disequilirbria	1	1	0	1	0	1	Mrs. Jennifer Smith	22
1974	Exact solutions to certain stochastic differential equation models of population genetics	2	2	0	0	0	0	NA	35
1974	Models for the Logarithmic Species Abundance Distribution	1	1	0	2	0	2	Miss M. Chang and Miss L. Moore	127
1974	Linkage and Inbreeding Coefficents in a Finite Random Mating Population	1	1	0	0	0	0	NA	10
1974	Competition and the Form of Habitat Shift	1	1	0	0	0	0	NA	230
1974	Age Structure and Stability in Models of Prey- Predator Ststems	2	2	0	0	0	0	NA	66
1974	Behavior of Pairs of Loci in Finite Monoecious Populations	2	2	0	0	0	0	NA	30
1974	Random Temporal Variation in Selection Intensities: Case of Large Population Size	2	2	0	0	0	0	NA	153
1974	Temporal Fluctuations in Selection Intensities: Case of Small Pop Size	2	2	0	0	0	0	NA	101
1975	Population Dynamics in a Stochastic Environment:Spectral Theory for the Linearized N-Species Lotka-Volterra Competition Equastions	1	1	0	0	0	0	NA	30
1975	Subdivided Populations: A Review of the One-and Two- Locus Deterministic Theory	2	2	0	0	0	0	NA	79
1975	Genetic Drift in Exogamous Marriage Systems	2	2	0	0	0	0	NA	14
1975	Stochastic Selection in Large and Small Populations	2	2	0	0	0	0	NA	17
1975	The Amino Acid Composition of Proteins: A Method of Analysis	2	2	0	0	0	0	NA	2
1975	Convergence of the Age Structure: Applications of the Projective Metric	3	3	0	0	0	0	NA	77
1975	Some Population Genetic Models Combining Artificial and Natural Selection Pressures: I. One-Locus Theory	2	1	1	0	0	0	NA	10
1975	Some Population Genetic Models Combining Artificial and Natural Selection Pressures: II. Two-Locus Theory	2	1	1	0	0	0	NA	13
1975	Stability of Ecosystems with Complex Food Webs	1	1	0	0	0	0	NA	8
1975	The Random Walk Model of Human Migration	1	1	0	1	1	0	Mr. Kukuhisa	30
1975	Modifier Theory and Meiotic Drive	1	1	0	0	0	0	NA	70
1975	A Discrete-Time Epidemic Model with Classes of Infective and Susceptibles	1	1	0	1	1	0	Jeffrey H. Kinrich	9
1975	A Population's Stationary Distribution and Chance of Extinction in a Stochastic Environment with Remarks on the Theory of Speccies Packing	2	2	0	0	0	0	NA	125
1975	Change in Gene Frequency under Selection in a Finite Population: A Comment	1	1	0	0	0	0	NA	0
1975	Eigenvalues of the Neutral Alleles Process	2	2	1	0	0	0	NA	24
1975	Derivation of the Eigenvalues of the Configuration Process Induced by a Labled Direct Product Branching Process	2	2	0	0	0	0	NA	8
1975	A Population Model Based on a Life Table that Includes Marriage and Parity	1	1	0	0	0	0	NA	32
1975	Kinship, Information and Biological Distance	1	1	0	0	0	0	NA	41
1975	On the Number of Segregating Sites in Genetical Models without Recombination	1	1	0	1	0	1	Mrs. M. Wu	3366
1975	A Discussion of Simulation Results for Various Aspects of the Neutral Alleles Model	1	0	1	0	0	0	NA	6
1975	The Measurement of the Characteristics of Natural Selection	1	1	0	0	0	0	NA	6
1975	The Population Genetics of Assorative Mating Based on Imprinting	2	2	0	0	0	0	NA	16
1975	Inbreeding: One Word, Several Meanings	1	1	0	0	0	0	NA	92
1975	General Two-Locus Selection Models: Some Objective, Results and Interpretations	1	1	0	0	0	0	NA	194
1975	Numerical Studies on Two-Loci Selection Models with General Viabilities	2	1	1	1	1	0	Boris Skolar	52
1975	A General Analysis of Resource Allocation by Competing Individuals	1	1	0	0	0	0	NA	6
1975	Constant Rate Population Harvesting: Equilibrium and Stability	2	2	0	0	0	0	NA	104
1975	Heterozygote Frequencies in Small Subpopulations	1	1	0	0	0	0	NA	114
1975	Extinction and Exponential Growth in Random Environments	1	1	0	0	0	0	NA	149
1975	A Dynamic Model for Human Population Growth	1	1	0	0	0	0	NA	68
1975	Clone Selection and the Mutation Rate	1	1	0	0	0	0	NA	11
1975	A Pariring Process	1	1	0	0	0	0	NA	9
1975	Retention Function of All Segments of IUD Usage: A Compound Distribution	2	1	1	0	0	0	NA	2
1975	The Stable Decomposition of the Rate of Natural Increase	1	1	0	0	0	0	NA	10
1975	Linkage Disequilibrium among Multiple Neutral Alleles Produced by Mutation in Finite Population	1	1	0	0	0	0	NA	105
1975	Analysis of Evolution: Evolutionary Rates, Independence and Treeness	2	2	0	0	0	0	NA	141
1975	The Covariance of Relatives Derived from a Random Mating Population	1	1	0	0	0	0	NA	7
1975	Sample Sizes Required to Detect Linkage Disequilibrium between Two or Three Loci	1	1	0	0	0	0	NA	175
1975	Population Genetics of Modifiers of Meiotic Drive: IV. On the Evolution of Sex-Ratio Distortion	2	1	1	0	0	0	NA	58
1975	Heterozygosity and Relationship in Regularly Subdivided Populations	1	1	0	0	0	0	NA	122
1975	Perspectives in Stochastic Models of Human Reproduction	1	1	0	0	0	0	NA	35
1975	Random Temporal Variation in Selection Intensities Acting on Infinite Diploid Populations: Diffusion Method Analysis	2	2	0	0	0	0	NA	27
1975	Some Basic Elements of Continuous Selection Models	1	1	0	0	0	0	NA	10
1975	The Distribution of Lethal Allelism in Finite Populations	2	2	0	0	0	0	NA	3
1975	Wandering Distributions and the Electrophoretic Profile	1	1	0	0	0	0	NA	179
1975	A Model for Genetic Relationship in Areally Continuous Plant Populations	1	1	0	0	0	0	NA	5
1975	The Effect of Spatial Heterogeneity on the Persistence of Predator-Prey Interactions	1	1	0	0	0	0	NA	118
1975	Limiting Similarity and the Form of the Competition Coefficient	1	1	0	0	0	0	NA	170
1976	An Application of Kinship Process to the Gene Frequencies: Linkage Disequilibrium Due to Random Drift in Mendelian Genetics with Reversible Mutation and in Molecular Genetic	1	1	0	0	0	0	NA	2
1976	Schoener's Model and Drosophila Competition	2	2	0	0	0	0	NA	39
1976	Age Structure Effects in Predator-Prey Interactions	2	NA	NA	0	0	0	NA	18
1976	Stochastic Difference Equastion Predictors of Population Fluctuations	1	1	0	0	0	0	NA	14
1976	An Interactive Nonrandom-Mating Two-Sex Model Whose Intrinsic Growth Rate Lies between One-Sex Rates	1	1	0	0	0	0	NA	16
1976	The Effect of Immigtatio on Genetic Control	1	1	0	0	0	0	NA	54
1976	A Slow Selection Analysis of Two Locus, Two Allele Traits	1	1	0	0	0	0	NA	17
1976	Time Symmetry and Asymmetry in Population and Deterministic Dynamic Systems	1	1	0	0	0	0	NA	17
1976	On the Asymptotic Trajectory of the Roots of Lotka's Equastion	2	1	0	0	0	0	NA	6
1976	Optimal Foraging, the Marginal Value Theorem	1	1	0	0	0	0	NA	4816
1976	The Theory of Prey-Predator Oscillations	1	1	0	0	0	0	NA	47
1976	A Model for Translocation Inheritance in Man, Segregation Patterns for a Single Centric-Fusion Translocation	1	1	0	0	0	0	NA	9
1976	A Note on Difference-Delay Equastions	2	2	0	0	0	0	NA	187
1976	Variablity in the Amount of Heterozygosity Maintained by Neutral Mutations	1	1	0	0	0	0	NA	76
1976	Discrete Time Models for Two-Species Competition	2	2	0	0	0	0	NA	269
1976	Calculation of Roots of Lotka's Equastion	1	1	0	0	0	0	NA	4
1976	Cultural and Biological Evolutionary Processes Selection for a Trait under Complex Transmission	2	2	0	0	0	0	NA	280
1976	On the Increase of Chromosome Mutations under Random Mating	2	2	0	0	0	0	NA	94
1976	On Survival Probabilities of Mutant Genes and the Evolution of Domiance	1	1	0	0	0	0	NA	0
1976	The Transmission of Genes via Pollen and Ovules in Gynodioecious Angiosperms	1	1	0	0	0	0	NA	258
1976	Coexistence of Species Competing for Shared Resources	2	2	0	0	0	0	NA	216
1976	Some Models of Population Structure and Evolution	2	1	1	0	0	0	NA	27
1976	Conditions for the Evolution of Altruism under Darwinian Selection	2	2	0	0	0	0	NA	179
1976	Resource PArtitioning Among Competing Species-A Coevolutionary Approach	1	1	0	0	0	0	NA	335
1976	Selection Within and Between Heterogenetic Associations in Fungi	1	1	0	0	0	0	NA	5
1976	Conditions for Genetic Polymorphism in Social Hymentopera under Selection at the Colony Level	2	2	0	0	0	0	NA	79
1976	Population Genetics of Modifiers of Meiotic Drive. III. Equilibrium Analysis of a General Mocel for the Genetic Control of Segregation Distortion	2	1	1	0	0	0	NA	31
1976	Stability of an Ageo Specific Population with Density Dependent Fertility	1	1	0	0	0	0	NA	60
1976	A Hybrid Model of Schistosomiasis with Snail Latency	1	1	0	0	0	0	NA	38
1976	The Decay of Genetic Variability in Geographically Structured Populations. II*	1	1	0	0	0	0	NA	86
1976	Nonvulnerability of Ecosystems in Unpredictable Environments	1	1	0	0	0	0	NA	61
1976	On the Limit to Nitche Overlap for Nonuniform Nitches	1	1	0	0	0	0	NA	18
1976	A Stochastic Theory for Rate Genes in Large Populations with Overlapping Generations	1	1	0	0	0	0	NA	11
1976	Modifier Theory of Meiotic Drive: Is Mendelian Segration Stable?	1	1	0	0	0	0	NA	38
1976	On Eradication of Schistosomiais	1	1	0	0	0	0	NA	31
1976	Wandering Distributions and the Elctrophoretic Profile. II	1	1	0	0	0	0	NA	28
1976	An Experimental Study of Weak Ergodicity in Human Populations	2	2	0	0	0	0	NA	24
1976	The Influence of Saturation on the Predator-Prey Relations	1	1	0	0	0	0	NA	3
1976	Preferential Mating. Nonrandom Mating of a Continuous Phenotype	1	0	1	0	0	0	NA	26
1976	Population Correlation and Population Kinship	1	1	0	0	0	0	NA	13
1976	The Role of Migration in the Genetic Structure of Populations in Temporally and Spatially Varying Environments. II. Island Models	1	1	0	0	0	0	NA	18
1976	Reversibility and the Age of an Allele. I. Moran's Infinitely Many Neutral Alleles Model	1	1	0	0	0	0	NA	72
1976	Role of Very Slightly Deleterious Mutations in Molecular Evolution and Polymorphism	1	0	1	0	0	0	NA	199
1976	On the Founder Effect and the Evolution of Altruistic Traits	2	2	0	0	0	0	NA	172
1976	Distribution of Nucleotide Differences between Two Randomly Chosen Cistrons in a Subdivided Population: The Finite Island Model	1	1	0	0	0	0	NA	43
1976	Alternatives to Lotka-Volterra Competition:Models of Intermediate Complexity	1	1	0	0	0	0	NA	205
1976	A Phenotypic Symmetric Selection Model for Three Loci, Two Alleles: The Case of Tight Linkage	2	2	0	0	0	0	NA	16
1976	Phenotypic Structure and Bifurcation Behavior of Population Models	3	NA	NA	0	0	0	NA	21
1976	Loss of Alleles in a Haploid Population with Varying Environment	1	1	0	0	0	0	NA	10
1976	Vladimir Aleksandrovich Kostitzin and Theoretical Ecology	2	2	0	0	0	0	NA	21
1977	The IUD Follow-up Study: A Scholastic Model	3	1	2	0	0	0	NA	0
1977	Distribution of Nuclotide Differences Between Two Randomly Chosen Cistrons in a Population of Variable Size	1	1	0	0	0	0	NA	12
1977	On a General Stochastic Epidemic Model	1	1	0	0	0	0	NA	44
1977	A Random-Walk of Human Mortality and Aging	2	2	0	0	0	0	NA	152
1977	Stable Population Analysis in Periodic Environments	2	2	0	0	0	0	NA	20
1977	The Distribution of the Proportion of the Genome Which is Homozygous by Descent in Inbred Individuals	1	1	0	0	0	0	NA	89
1977	The Genotypic Probability Structure of an Individual at the Head of a Pedigree	1	1	0	0	0	0	NA	1
1977	Some Observations on the Evolution of Reproductive Rate and Competitive Ability in Flowering Plants	1	1	0	0	0	0	NA	35
1977	Comparison of Linear and Nonlinear Models for Human Population Dynamics	2	2	0	0	0	0	NA	25
1977	A Multivariate Model for Growth of Populations	2	2	0	0	0	0	NA	10
1977	Is The Most Frequent Allele The Oldest?	2	2	0	0	0	0	NA	271
1977	The Evolution of Continous Variation. II. Complex Transmission and Assortative Mating	2	2	0	0	0	0	NA	38
1977	Mathematical Models for the Control of Pests and Infectious Diseases: A Survey	1	NA	NA	0	0	0	NA	174
1977	Correlation of Gene Frequencies between Neutral Linked Genes in FInite Populations	1	1	0	2	0	2	Marjorie McEwan and Jenny Smith	23
1977	The Effect of Selection on Genetic Balance when the Population Size is Varying	1	1	0	0	0	0	NA	9
1977	Stabalizing Effects of Spatial Heterogeneity in Predator-Prey Systems	1	1	0	0	0	0	NA	107
1977	The Population Structure Associated with the Ewens Sampling Formula	1	1	0	0	0	0	NA	137
1977	A Note on Multidimensional Models of Neutral Mutation	1	1	0	0	0	0	NA	18
1977	Mean and Variance of Fst in a Finite Number of Incomplete Isolated Populations	3	3	0	0	0	0	NA	92
1977	Drift Variances of Fst and Gst Statistics obtained from a Finited Number of Isolated Populations	2	2	0	1	1	0	Yoshio Tateno	98
1977	Evolution, Population Dynamics, and Stability: A Comment	1	1	0	0	0	0	NA	10
1977	Subunit Size and Genetic Variation of Enzymes in Natural Populations of Drosophilia	2	2	0	0	0	0	NA	54
1977	A Note on Multidimensional Models of Neutral Mutation	2	2	0	0	0	0	NA	18
1977	Gene Frequency Patterns in the Levene Subdecided Population Model	1	1	0	0	0	0	NA	29
1977	Variable Spatial Selection with Two Stages of Migration and Comparisons between Different Timings	2	2	0	0	0	0	NA	11
1977	On the Founder Effect and the Evolution of Altruistic Traits: An Ecogenetical Approach	1	1	0	0	0	0	NA	98
1977	Fecundity Differences between Mating Pairs for a Single Autosomal Locus, Sex Differences in Viability and Nonoverlapping Generations	1	1	0	0	0	0	NA	17
1977	Graphical Distribution of a Neutral Allele Considered as a Branching Process	2	2	0	0	0	0	NA	4
1977	Multivariate Measures of Niche Overlap Using Discriminanat Analysis	2	2	0	1	1	0	T. Carney	48
1977	Spatial Heterogeneity and the Stability of Predator-Prey Systems	1	1	0	0	0	0	NA	207
1977	Worker-Queen Conflict and the Evolution of Social Insects	3	3	0	0	0	0	NA	97
1977	A Model of Migration Modification	1	1	0	0	0	0	NA	28
1977	Two Loci with Two Alleles: Linkage Equilibrium and Linkage Disequilibrium Can Be Simultaneously Stable	2	2	0	0	0	0	NA	22
1977	The role of the Mosaic Phenomena in Natural Communities	2	2	0	0	0	0	NA	514
1977	Random Environments and Stochastic Calculus	1	1	0	0	0	0	NA	307
1977	Reversibility and the Age of an Allele II. Two-Allele Models, with Selection and Mutation	1	1	0	0	0	0	NA	43
1977	Predation, Apparent Competition, and the Structure of Prey Communities	1	1	0	0	0	0	NA	2059
1977	A Two-Locus Selection Hypothesis for Duchenne Muscular Dystrophy	3	2	1	0	0	0	NA	11
1977	An Euler Contribution to Stable Theory from Sussmilch Gottliche Ordnung	1	1	0	0	0	0	NA	3
1977	Gene Flow and Genetic Drift in a Species Subject to Frequent Local Extinctions	1	1	0	0	0	0	NA	568
1977	Optimal Foraging in Patches: A Case for Stochasticity	1	1	0	0	0	0	NA	409
1977	A Theoretical Study of Population Dynamics in the Sheep Tick	2	NA	NA	0	0	0	NA	11
1977	Theoretical Aspects of Sexual Selection	1	1	0	0	0	0	NA	77
1977	On Transmission and Control of Schistosomiasis with Comments on Macdonald's Model	1	1	0	0	0	0	NA	14
1977	Population Growth with Stochastic Fluctuations in the Life Table	1	1	0	0	0	0	NA	112
1978	Dynamics of Correlated Genetic Systems. II. Simulation Studies of Chromosomal Segments under Selection	1	1	0	0	0	0	NA	29
1978	Selection Effects in a Model of Two Intermigrating Colonies of Finite Size	1	1	0	0	0	0	NA	10
1978	The Joint Effects of the Release of Sterile Males and Immigration of Fertilized Females on a Density Regulated Population	1	1	0	0	0	0	NA	87
1978	Optimal Foraging: Movement Patterns of Bumblebees Between Inflorescences	1	1	0	0	0	0	NA	450
1978	On the Mutual Maintenance of a Polymorphism in Two Nonepistatic Loci with Partial Selfing	1	1	0	0	0	0	NA	4
1978	Asymptotic and Numerical Approximation of Roots of Lotka's Equation	2	2	0	0	0	0	NA	2
1978	Genetic Variation in Natural Populations: Patterns and Theory	1	1	0	0	0	0	NA	1218
1978	On Sorting out Poole's Paper "Stochastic Difference Equation Predictors of Population Fluctuations" about the Box-Jenkins Analysis and Forecasting of Ecological Time Series	1	1	0	0	0	0	NA	9
1978	A Reply to Anderson	1	1	0	0	0	0	NA	7
1978	A Stochastic Model of a Temperature-Dependent Population	3	3	0	0	0	0	NA	120
1978	Ages, Extiction Times, and First Passage Probabilities for a Multiallele Diffusion Model with Irreversible Mutation	2	NA	NA	0	0	0	NA	16
1978	Theoretical Aspects of Sexual Selection: A Generalized Model of Mating Behaviour	1	1	0	0	0	0	NA	28
1978	A Reexamination of Stability in Randomly Varying versus Deterministic Enviornments with Comments on the Stochastic Theory of Limiting Similarity	1	1	0	0	0	0	NA	107
1978	Homozygosity in Three-Allele Populations	2	NA	NA	0	0	0	NA	3
1978	Random Evolutionarily Stable Strategies	3	3	0	0	0	0	NA	81
1978	Sex Differences in Linkage between Autosomal Loci	1	1	0	0	0	0	NA	5
1978	Competition, Kin Selection, and Evolutionary Stable Strategies	2	2	0	0	0	0	NA	135
1978	Evolution in Fine-Grained Environments I. Environmental Runs and the Evolution of Homeostasis	2	2	0	0	0	0	NA	13
1978	On Necessary and Sufficient Conditions for Group Selection Efficacy	1	1	0	0	0	0	NA	40
1978	Effects of Density-Restricted Food Encounter on Some Single-Level Competition Models	1	1	0	0	0	0	NA	58
1978	The Mathematical Theory of Group Selection. I. Full Solution of a Nonlinear Levins E = E(x) Model	1	1	0	0	0	0	NA	3
1978	Optimal Foraging Area: Size and Allocation of Search Effort	1	1	0	0	0	0	NA	171
1978	A General Model to Account for Enzyme Variation in Natural Populations. V. The SAS-CFF Model	1	1	0	0	0	0	NA	132
1978	Persistence Times of Populations with Large Random Fluctuations	2	2	0	1	1	0	Christopher Hermansen	95
1978	Sigmoid Functional Responses and Population Stability	2	2	0	0	0	0	NA	65
1978	Box-Jenkins Forecasting in Ecology: An Answer to Poole	1	1	0	0	0	0	NA	3
1978	The Time-Energy Budget of a Moose	2	2	0	0	0	0	NA	138
1978	Diet Optimization in a Generalist Herbivore: The Moose	1	1	0	0	0	0	NA	654
1978	Homage to the Red Queen. I. Coevolution of Predators and Their Victims	2	2	0	0	0	0	NA	102
1978	Homage to the Red Queen. I. Coevolution of Predators and Their Victims	2	2	0	0	0	0	NA	102
1978	About the Theory of Competing Species	4	NA	NA	0	0	0	NA	13
1978	Influene of Competition on Patchiness in a Random Environment	1	1	0	0	0	0	NA	25
1978	Fixation Times and Probabilities for an Independent Loci Model in Genetics	2	NA	NA	0	0	0	NA	9
1978	A General Formula for the Sensitivity of Population Growth Rate to Changes in Life History Parameters	1	1	0	0	0	0	NA	438
1978	On the History of Populations Governed by a Leslie Matrix	2	1	1	0	0	0	NA	2
1978	The Accumulation of Deleterious Genes in a Population- Muller's Ratchet	1	1	0	0	0	0	NA	416
1978	Darwinian Selection and "Altruism"	1	1	0	0	0	0	NA	206
1978	Comparisons of Positive Assortative Mating and Sexual Selection Models	1	1	0	0	0	0	NA	35
1978	Number of People and Number of Generations Affected by a Single Deleterious Mutation	2	2	0	0	0	0	NA	4
1978	Equilibrium Distributions for Deleterious Genes in Large Stationary Populations	2	2	0	0	0	0	NA	11
1978	Demographic Incidene Rates	1	1	0	0	0	0	NA	15
1978	An Immunization Model for a Heterogeneous Population	1	1	0	0	0	0	NA	209
1978	On Optimal Oviposition Behavior in Phytophagous Insects	1	1	0	0	0	0	NA	551
1978	A Standardized Two-Sex Stable Population	1	1	0	0	0	0	NA	6
1978	Reproductive Success for Social Hymenopetera	1	0	1	0	0	0	NA	4
1978	Spatial Heterogeneity and the Stability of Predator-Prey Systems: Predator-Mediated Coexistence	1	1	0	0	0	0	NA	75
1978	An Energy-Based Model of Optimal Feeding-Territory Size	1	1	0	1	1	0	Randy Sharp	113
1978	Analysis of Partial Assortative Mating and Sexual Selection Models for a Polygamous Species Involving a Trait Based on Levels of Heterozygosity	2	1	1	0	0	0	NA	10
1978	Some Multiallele Partial Assortative Mating Systems for a Polygamous Species	2	1	1	0	0	0	NA	7
1978	The Genetics of Sex Ratio Distortion by Cytoplasm Infection under Maternal and Contagious Tramission: An Epidemiological Study	2	1	1	0	0	0	NA	53
1979	Enzyme Polymorphism in Plant Populations	1	1	0	1	0	1	Mrs. M. Ortner	786
1979	Equilibrium Populations of Heterostylous Plants	1	1	0	0	0	0	NA	86
1979	Evolution of Alturism under Group Selection in Large and Small Populations in Fluctating Environments	1	0	1	0	0	0	NA	88
1979	Fixation Probabilites and Effective Population Numbers in Diploid Populations with Overlapping Generations	2	2	0	0	0	0	NA	71
1979	Sojourn Times for Conditioned Markov Chains in Genetics	1	1	0	0	0	0	NA	2
1979	The Roles of Speciation and Divergence Time in the Loss of Duplicate Gene Expression	3	3	0	0	0	0	NA	41
1979	On the Distribution of Allele Frequencies in a Diffusion Model	1	1	0	1	0	1	M. Wu	58
1979	A Generalized Model of Optimal Diets	1	1	0	0	0	0	NA	76
1979	Variance of Genetic Distance and Correlation of Heterozygosity between Populations under the Pressure of Stepwise Mutation	1	1	0	0	0	0	NA	1
1979	Theoretical Aspects of Sexual Selection: Variation in Threshold of Female Mating Response	1	1	0	0	0	0	NA	8
1979	Testing the Generalized Neutrality Hypothesis	1	1	0	0	0	0	NA	17
1979	Return Time and Vulnerability For a Food Chain Model	2	2	0	0	0	0	NA	40
1979	Competitive overlap and Coexistence	1	0	1	0	0	0	NA	1
1979	Sexual Selection Encounter Models	2	2	0	0	0	0	NA	14
1979	Why are Heterozygotes Ofen Superior in Fitness?	1	1	0	0	0	0	NA	31
1979	Aspects of Variance and Covariance Anaylsis with Cultural Inheritance	1	1	0	0	0	0	NA	62
1979	Models of Multifactorial Inheritance: I, Multivariate Formulations an dBasic Convergance Results	1	1	0	0	0	0	NA	78
1979	Models of Multifactorial Inheritance: II, The Covariance for a Scalar Phenotype under Selective Assortative Mating and Sex- Dependent Symmetric Paarental- Transmission	1	1	0	0	0	0	NA	25
1979	Models of Multifactorial Inheritance III: Calculation of Covariance of Relatives under Selective Assortative Mating	1	1	0	0	0	0	NA	15
1979	The Effect of Genetic Incompatibility of Demes on Total Population Development	1	1	0	0	0	0	NA	0
1979	A General Method for Constructing Increment-Decrement Life Tables That Agree with the Data*	1	1	0	0	0	0	NA	9
1979	Invariant Distributions for Multi-Population Models in Random Environments	1	1	0	0	0	0	NA	30
1979	Time-Dependent Solution to Age-Structured Equations for Sexual Populations	2	NA	NA	0	0	0	NA	6
1979	Ecological Stability and Social Hierarchy	2	2	0	0	0	0	NA	40
1979	Index Measures for Assessing the Mode of Inheritance of Continuously Distributed Traits: I, Theory and Justifications	3	2	1	0	0	0	NA	55
1979	Persistence and Stability of Seed-Dispersed Species in a Patchy Environment*	3	3	0	0	0	0	NA	64
1979	A Decomposition Method for the Stability Analysis of Large Microbial Systems	3	NA	NA	0	0	0	NA	4
1979	The Structure of Food Webs	1	1	0	0	0	0	NA	179
1979	Comparative Statics and Stochastic Dynamics of Age-Structured Populations	1	1	0	0	0	0	NA	78
1979	Regular and Chaotic Cycling in Models of Ecological Genetics*	1	0	1	0	0	0	NA	50
1979	Genealogical Structure and Correlations in Gene Extinction	1	0	1	0	0	0	NA	9
1979	The Transition Density for Multiple Neutral Alleles	1	NA	NA	0	0	0	NA	8
1979	Convergence of Human Age-Sex Distributions to an Equilibrium-State Age-Sex Distribution	1	1	0	0	0	0	NA	1
1979	Dual Diffusions, Killed Diffusions, and the Age Distribution Problem in Population Genetics	1	1	0	0	0	0	NA	3
1979	Evolution of Marine Invertebrate Reproductive Patterns	2	2	0	0	0	0	NA	273
1979	Local Stability of a Population with Density-Dependent Fertility	1	1	0	0	0	0	NA	40
1979	Sexual Selection, Population Density, and Availability of Mates	1	1	0	0	0	0	NA	39
1979	The Effects of Extra Chances to Live on Life Table Functions	1	1	0	0	0	0	NA	10
1979	Inter-Locus Interactions: A Review of Experimental Evidence	1	1	0	0	0	0	NA	94
1980	On the Evoluntionary Significance of Mendel's Ratios	2	2	0	0	0	0	NA	6
1980	Lines of Descent in the Diffusion Approximation of Neutral Wright-Fisher Models	1	1	0	0	0	0	NA	173
1980	Allele Frequencies in Multidimensional Wright-Fisher Models with a Gerneral Symmetric Mutation Structure	1	1	0	0	0	0	NA	19
1980	Fecundity, Developmental Time, and Population Growth Rate: An Analytical Solution	2	2	0	0	0	0	NA	113
1980	Consumer Function Response and Competition in Consumer-Resource Systems	1	1	0	0	0	0	NA	62
1980	Evolution of Haplodiploidy Models for Inbred and Outbred Systems	1	1	0	0	0	0	NA	48
1980	The Stationary Distribution of an Asymmetrical Model of Selection in a Random Environment	1	1	0	0	0	0	NA	10
1980	A Stochastic Foraging Model with Predator Training Effects: I. Functional Response, Switching, and Run Lengths	1	1	0	0	0	0	NA	47
1980	Conditions for the Existence of Stationary Densities for Some Two-Dimensional Diffusion Processes with Applications in Population Biology	2	2	0	0	0	0	NA	32
1980	A Phenotypic Model for the Evolution of Ecological Characters	1	1	0	0	0	0	NA	8
1980	An Optimal Diet in a Patchy Environment	1	1	0	0	0	0	NA	71
1980	Models of Multifactorial Inheritance. V. Linear Assortative Mating as against Selective (Nonlinear) Assortative Mating	1	1	0	0	0	0	NA	8
1980	Models of Multifactorial Inheritance. VI. Formulas and Properties of the Vector Phenotype Equilibrium Covariance Matrix	1	1	0	0	0	0	NA	10
1980	Multilocus Population Genetics: Relative Importance of Selection and Recombination	2	2	0	0	0	0	NA	14
1980	Age- and Density-Dependent Population Dynamics in Static and Variable Environments	2	2	0	0	0	0	NA	40
1980	Loss of Selectively Neutral Alleles in Small Populations and Regular Mating Systems	1	1	0	0	0	0	NA	8
1980	A Method to Estimate Demographic Intensities via Cumulative Incidence Rates	1	1	0	0	0	0	NA	8
1980	Theories of Kin and Group Selection: A Population Genetics Perspective	2	1	1	0	0	0	NA	213
1980	A Model of Electrophoretic Variation: Finite Population and Finite Numbers of Mutable Sites	2	2	0	0	0	0	NA	0
1980	Analysis of Compensatory Leslie Matrix Models for Competing Species	4	NA	NA	0	0	0	NA	23
1980	Further Characterization of the Long-Run Population Distribution of a Deleterious Gene	2	2	0	0	0	0	NA	13
1980	Learning to Forage-Optimally?	1	1	0	0	0	0	NA	150
1980	A Stochastic Compartment Model Representation of Chronic Disease Dependence: Techniques for Evaluating Parameters of Partially Unobserved Age Inhomogeneous Stochastic Processes	2	2	0	0	0	0	NA	30
1980	The Gene Identity States of a Descendant	1	NA	NA	0	0	0	NA	7
1980	Polymorphic Equilibria with Assortative Mating and Selection in Subdivided Populations	1	1	0	0	0	0	NA	4
1980	Timing in the Life Histories of Insects	1	1	0	1	1	0	Frank Archibeque	54
1980	Optimal Switching to Diapause in Relation to the Onset of Winter	1	1	0	0	0	0	NA	118
1980	A Class of Models of Selectively Neutral Alleles	2	2	0	0	0	0	NA	14
1980	Models of the Evolution of Altruism	1	1	0	0	0	0	NA	41
1980	The Maximum Yield Problem: Distortion in the Yield Curve due to Age Structure	1	1	0	0	0	0	NA	7
1980	A Nonlinear, Second-Order Population Model	1	1	0	0	0	0	NA	8
1980	Simulataneous Determination of Fluctuating Age Structure and Mortality from Field Data	2	NA	NA	0	0	0	NA	11
1980	Oscillatory Phenomena in a Model of Infectious Diseases	1	1	0	0	0	0	NA	111
1980	Bayesian Birds: A Simple Example of Oaten's Stochastic Model of Optimal Foraging	1	1	0	0	0	0	NA	243
1980	The Influence of the Type 3 (Sigmoid) Functional Response upon the Stability of Predator-Prey Difference Models	1	1	0	0	0	0	NA	33
1980	The Evolution of Life Histories under Pleiotropic Constraints and r-Selection	1	1	0	0	0	0	NA	23
1980	The Number of Alleles in Electrophoretic Experiments	1	1	0	0	0	0	NA	11
1980	Evolution and Intraspecific Exploitative Competition I. One-Locus Theory for Small Additive Gene Effects	2	2	0	0	0	0	NA	118
1980	Population Dynamics in Variable Environments I. Long-Run Growth Rates and Extinction	2	2	0	0	0	0	NA	283
1980	The Effect of Dispersal on Population Size in a Temporally Varying Environment	1	1	0	0	0	0	NA	49
1980	Disturbance, Coexistence, History, and Competition for Space	1	1	0	0	0	0	NA	531
1980	The Potential of Control of Cereal Rust by Natural Enemies	1	1	0	0	0	0	NA	22
1980	Effect of Mating Structure on Variation in Inbreeding	3	3	0	0	0	0	NA	58
1980	Minimisation of Extinction Probabilities in Reproducing Populations	1	1	0	0	0	0	NA	12
1981	Logistic Growth with Random Density Independent Disasters	1	1	0	0	0	0	NA	88
1981	A Two-Locus Model for Polymorphism for Sex-Linked Meiotic Drive Modifiers with Possible Applications to Aedes aegypti	2	NA	NA	0	0	0	NA	18
1981	Density Independent Fluctuations of Population Size	2	2	0	0	0	0	NA	7
1981	On Optimal Predator Search	1	1	0	0	0	0	NA	126
1981	On Relatedness and Adaptive Topography in Kin Selection	2	1	1	0	0	0	NA	110
1981	The Problem of Persistence in Economic- Demographic Cycles	1	1	0	0	0	0	NA	10
1981	A Stochastic Foraging Model with Predator Training Effects. II. Optimal Diets	1	1	0	0	0	0	NA	70
1981	Frequency Dependence in a Model of Sexual Selection	2	1	1	0	0	0	NA	7
1981	Neutral Two-Locus Multiple Allele Models with Recombination	1	1	0	0	0	0	NA	85
1981	The Detection of Particular Genotypes in Finite Populations I. Natural Selection Effects	2	2	0	0	0	0	NA	11
1981	The Detection of Particular Genotypes in Finite Populations II. The Effects of Partial Penetrance and Family Structure	2	2	0	0	0	0	NA	9
1981	On Horn's Markovian Model of Forest Dynamics with Particular Reference to Tropical Forests	1	1	0	0	0	0	NA	67
1981	Further Remarks on Darwinian Selection and "Altruism"	2	2	0	0	0	0	NA	26
1981	On the Evolution of Behavioral Reproductive Isolation: The Wallace Effect	2	2	0	0	0	0	NA	21
1981	Field Estimation of Competition Intensity	1	1	0	0	0	0	NA	13
1981	Models for Spatially Distributed Populations: The Effect of Within-Patch Variability	1	1	0	0	0	0	NA	164
1981	Evolution in Fine-Grained Environments. II. Habitat Selection as a Homeostatis Mechanism	2	2	0	0	0	0	NA	41
1981	Continuous-Genotype Models and Assortative Mating	1	1	0	0	0	0	NA	33
1981	Population Dynamics of Species with Gynogenetic Sibling Species	3	NA	NA	0	0	0	NA	35
1981	Assortative Mating, Selection and Mutation Models for Continuous Variation: A Reply to Felsenstein	2	2	0	0	0	0	NA	10
1981	Selection Component Analysis of Natural Polymorphisms Using Population Samples Including Mother-Offspring Combinations, II	2	1	1	0	0	0	NA	19
1981	Evolution in Fine-Grained Environments. II. Habitat Selection as a Homeostatic Mechanism	2	2	0	0	0	0	NA	41
1981	Kin selection and strong evolutionary stability of mutual help	2	2	0	0	0	0	NA	225
1981	Niche overlap and invasion of competitors in random environments I. Models without demographic stochasticity	1	1	0	1	1	0	Hugh Everett	127
1981	Towards a genetic theory for the evolution of the sex ratio II. Haplodiploid and diploid models with sibling and parental control of the brood sex ratio and brood size	2	1	1	0	0	0	NA	38
1981	Stability and bifurcation in age-dependent population dynamics	1	NA	NA	0	0	0	NA	39
1981	Dynamics of single-species population growth: Experimental and statistical analysis	2	2	0	0	0	0	NA	32
1981	Some circumstances assuring monomorphism in subdivided populations	1	1	0	0	0	0	NA	4
1981	Mathematical models for continuous culture growth dynamics of mixed populations subsisting on a heterogeneous resource base. II. Predation and trophic structure	1	1	0	0	0	0	NA	10
1981	Theoretical consequences of competition between successive generations on population stability and life cycle evolution	1	1	0	0	0	0	NA	3
1981	A review of theoretical aspects of HLA and disease associations	1	0	1	0	0	0	NA	153
1981	On the concavity of island biogeographic rate functions	2	2	0	0	0	0	NA	8
1981	A single locus model of selection in permanent translocation heterozygotes	2	2	0	0	0	0	NA	6
1981	Analysis of central equilibria in multilocus systems: A generalized symmetric viability regime	2	2	0	0	0	0	NA	29
1981	An empirically based estimate of home range	1	1	0	0	0	0	NA	438
1981	Optimal nectar production in a hummingbird pollinated plant	1	1	0	0	0	0	NA	51
1981	Studies on assortative mating. III. The effects of incomplete penetrance in assortative mating systems	1	1	0	0	0	0	NA	0
1981	Stationary densities for frequency-dependent selection	1	NA	NA	0	0	0	NA	0
1981	Conditions for balanced polymorphism in the presence of differential delay in developmental time	1	1	0	0	0	0	NA	4
1981	Is the between-population variance negligible in the total variance of heterozygosity? Case of a finite number of loci subject to the infinite-allele model in finite monoecious populations	1	1	0	0	0	0	NA	4
1982	Hard Selection in Haploid Species	1	1	0	0	0	0	NA	1
1982	Variational Models of Life-Histories: When Do Solutions Exist?	2	2	0	0	0	0	NA	14
1982	Diversity Dissimilarity Coefficients: A Unified Approach	1	1	0	0	0	0	NA	1109
1982	Age Structure in Predator-Prey Systems. I. A General Model and a Specific Example	2	2	0	0	0	0	NA	33
1982	Age Structure in Predator-Prey Systems. II. Functional Response and Stability and the Paradox of Enrichment	3	3	0	0	0	0	NA	22
1982	Coevolution in Resource-Limited Competition Communities	1	1	0	0	0	0	NA	70
1982	Spatial Heterogeneity and Interspecific Competition	2	1	1	0	0	0	NA	124
1982	Population Dynamics in Variable Environments. II. Correlated Environments, Sensitivity Analysis and Dynamics	1	1	0	0	0	0	NA	133
1982	Population Dynamics in Variable Environments. III. Evolutionary Dynamics of r-Selection	1	1	0	0	0	0	NA	184
1982	Asymptotic Birth Trajectories in the Discrete form of Stable Population Theory	1	1	0	0	0	0	NA	5
1982	Measuring Genetic Relatedness in Natural Populations: Methodology	2	2	0	0	0	0	NA	166
1982	Multiple Switches between Vegetative and Reproductive Growth in Annual Plants	2	2	0	0	0	0	NA	144
1982	Correlation of Heterozygosity and the Number of Alleles in Different Frequency Classes	2	2	0	0	0	0	NA	23
1982	A Randomized SAS-CFF Model of Natural Selection in a Random Environment	1	1	0	1	1	0	Rod Thompson	12
1982	A Classs of Cumulant Plots for Assessing Mode and Asymmetry of Transmission of a Quantitative Trait	2	2	0	0	0	0	NA	12
1982	Competition between Juveniles and Adults in Age-Structured Populations	1	1	0	0	0	0	NA	64
1982	Optimal Patch Use in a Stochastic Environment	1	1	0	0	0	0	NA	295
1982	Selection in Diplo-haplonts	1	1	0	0	0	0	NA	8
1982	On the Evolution of Fluctuating Segregation Distortion	2	2	0	0	0	0	NA	3
1982	A Method for Estimating Rates of Nucleotide Substitution Using DNA Sequence Data	2	NA	NA	0	0	0	NA	17
1982	Choice of Function for Mortality Analysis: Effective Forecasting Depends on a Minimum Parameter Representation	1	1	0	0	0	0	NA	112
1982	The Role of Rapid Dispersal in the Population Dynamics of Competition	2	0	2	0	0	0	NA	55
1982	On the Concept of the Effective Population Size	1	1	0	0	0	0	NA	118
1982	A Mathematical Approach to Multiple Genetic Relationships	1	1	0	0	0	0	NA	16
1982	Optimal Rates of Dispersal I. Haploid Populations	1	1	0	0	0	0	NA	119
1982	Optimal Rates of Dispersal II. Diploid Populations	1	1	0	0	0	0	NA	85
1982	On Evolutionary Genetic Stability of the Sex Ratio	2	2	0	0	0	0	NA	117
1982	On the Evolution of Sex Determination and the Sex Ratio in Haplodiploid Populations	2	2	0	0	0	0	NA	28
1982	Graded Allocation between Vegetative and Reproductive Growth for Annual Plants in Growing Seasons of Random Length	2	2	0	0	0	0	NA	182
1982	On the Resolution of Chaos in Population Models	1	1	0	0	0	0	NA	21
1982	Multiple Interactions: An Empirically Suggested Model	1	1	0	0	0	0	NA	1
1982	Towards a Genetic Theory for the Evolution of the Sex Ratio III. Parental and Sibling Control of Brood Investment Ratio under Partial Sib-Mating	2	1	1	0	0	0	NA	65
1982	The Reduction Property for Central Polymorphisms in Nonepistatic Systems	2	1	1	0	0	0	NA	4
1982	The Distributions of Nucleotide Site Differences between Two Finite Sequences	2	2	0	0	0	0	NA	11
1982	A Criterion for Stability-Instability at Fixation States Involving an Eigenvalue One with Applications in Population Genetics	2	2	0	0	0	0	NA	21
1982	The Evolution of Resource Partitioning in a Multidimensional Resource Space	2	2	0	0	0	0	NA	39
1982	Instability and Complex Dynamic Behaviour in Population Models with Long Time Delays	3	3	0	0	0	0	NA	98
1982	Assortative Mating and Gene Flow in the Lesser Snow Goose: A Modelling Approach	3	2	1	0	0	0	NA	16
1982	Evolutionarily Stable Strategies and Viability Selection in Mendelian Populations	1	1	0	0	0	0	NA	93
1982	Genetic Identity in Subdivided Populations. I. Two Equal-Sized Subpopulations	2	2	0	0	0	0	NA	1
1982	Some Assortative Mating Models Based on Phenotype Classes Determined by a Dominance Ordering of Multiple Alleles	1	1	0	0	0	0	NA	1
1982	Sexual Recombination under the Joint Effects of Mutation, Selection, and Random Sampling Drift	1	1	0	0	0	0	NA	16
1982	The Evolution of Recombination in Permanent Translocation Heterozygotes	2	2	0	0	0	0	NA	3
1982	Estimating Population Growth Rates from Stochastic Leslie Matrices	2	2	0	0	0	0	NA	19
1982	Foraging-Area Size and Food Density: Some Predictive Models	1	0	1	0	0	0	NA	11
1982	Quantitative Character Dynamics: Gametic Model	1	1	0	0	0	0	NA	6
1982	Niche Shift and the Minimisation of Competition	1	NA	NA	0	0	0	NA	23
1982	Some Developments in Mathematical Demography and Their Application to the People's Republic of China	1	NA	NA	0	0	0	NA	24
1982	The Lek Paradox Is Not Resolved	2	2	0	0	0	0	NA	157
1982	Minimax Strategies for a Predator-Prey Game	1	1	0	0	0	0	NA	34
1983	Qualitative Behavior of a Selectively Neutral Allelic Model	2	2	0	0	0	0	NA	8
1983	Simulating Allele Frequencies in a Population and the Genetic Differentiation of Populations under Mutation Pressure	2	2	0	0	0	0	NA	24
1983	The Probability that Related Individuals Share Some Section of Genome Identical by Descent	1	1	0	0	0	0	NA	166
1983	Sexual Selection and Fertility	1	1	0	0	0	0	NA	6
1983	Variance of Actual Inbreeding	2	2	0	0	0	0	NA	54
1983	Assortative Mating and the Segregation Variance	1	1	0	0	0	0	NA	6
1983	The Systematic Formulation of Population Models for Insects with Dynamically Varying Instar Duration	2	2	0	0	0	0	NA	180
1983	Distribution of Mutants in Aggregates of Cultured Cells	2	2	0	0	0	0	NA	2
1983	On the Within-Sibship Variance	1	0	1	0	0	0	NA	2
1983	Optimal Rates of Dispersal. III. Parent-Offspring Conflict	1	1	0	0	0	0	NA	86
1983	Properties of the Major Gene Index for Three-Alele and Two-Locus Models	2	1	1	0	0	0	NA	1
1983	Properties of a Neutral Allele Model with Intragenic Recombination	1	1	0	0	0	0	NA	739
1983	A Simple Stochastic Gene Substitution Model	1	1	0	0	0	0	NA	187
1983	On the Evolution of Multigene Families	1	0	1	0	0	0	NA	210
1983	Some Stochastic Models for Plasmid Copy Number	2	2	0	0	0	0	NA	16
1983	Selection in Complex Genetic Systems. V. Some Properties of Mixed Selfing and Random Mating with Two Loci	2	2	0	0	0	0	NA	2
1983	The Effect on Homozygosity of Selective Differences between Sites of Transposable Elements	2	2	0	0	0	0	NA	19
1983	Evolution of Dispersal in Density Regulated Populations	1	0	1	0	0	0	NA	27
1983	The Effect on Neutral Gene Flow of Selection at a Linked Locus	1	1	0	1	NA	NA	S. Kennedy	44
1983	Models for the Evolution of Protandry in Insects	1	1	0	0	0	0	NA	126
1983	Behavioural Consequences of Hunting by Expectation: A Simulation Study of Foraging Tactics	1	1	0	0	0	0	NA	30
1983	Age-Dependent Predation Is Not a Simple Process. I. Continuous Time Models	1	1	0	0	0	0	NA	168
1983	Emergence Patterns in Male Butterflies: A Hypothesis and a Test	5	5	0	0	0	0	NA	171
1983	Linkage Disequilibrium of Extranuclear Genes under Neutral Mutations and Random Genetic Drift	1	1	0	0	0	0	NA	7
1983	Life-History Strategies of Optimal Foragers	1	1	0	0	0	0	NA	23
1983	Optimal Sampling for Pedigree Analysis: Paramter Estimation and Genotypic Uncertainty	1	1	0	0	0	0	NA	10
1983	A Two-Locus Mutation - Selection Model and Some of Its Evolutionary Implications	2	2	0	1	0	1	Mrs. Barbara Anderson	27
1983	Conditions for Protection of an Allele in Linear HOmogeneous Stepping Stone Models	1	1	0	0	0	0	NA	3
1983	The Fate of Autosomal Modifiers of the Sex-Ratio Trait in Drosophila and Other Sex-Linked Meiotic Drive Systems	1	1	0	0	0	0	NA	40
1983	Multilocus Model of Sympatric Speciation I. One Character	1	1	0	0	0	0	NA	34
1983	Multilocus Model of Sympatric Speciation II. Two Characters	1	1	0	0	0	0	NA	31
1983	Optimal Foraging and the Traveing Salesman	1	1	0	0	0	0	NA	69
1983	Estimation of the Neutral Mutation Rate in a Finite Population from DNA Sequence Data	1	1	0	0	0	0	NA	21
1983	Two-Locus, Fourth-Order Gene Frequency Moments: Implications for the Variance of Squared Linkage Disequilibrium and the Variance of Homozygosity	2	2	0	0	0	0	NA	4
1983	General Analysis of Frequency-Dependent Sexual Selection at a Multi-allelic Locus	1	1	0	0	0	0	NA	6
1983	The Joint Evolution of Seed Dormancy and Flowering Time in Annual Plants Living in Variable Environments	1	1	0	0	0	0	NA	49
1983	Can Spatial Variation Alone Lead to Selection for Dispersal?	1	1	0	0	0	0	NA	360
1983	Conditions for Protected Polymorphism in Subdivided Plant Populations: 1. Uniform Pollen Dispersal	2	2	0	0	0	0	NA	20
1983	The Robustness of Neutral Models of Geographic Variation	1	1	0	0	0	0	NA	72
1983	Uniqueness of Polymorphic Equilibria under Soft Selection	1	1	0	0	0	0	NA	2
1983	Diversity Indices with Gamma Distributed Importance Values	2	NA	NA	0	0	0	NA	0
1983	Evolutionary Game Dynamics in Diploid Populations	1	1	0	0	0	0	NA	25
1984	Risk Spreading as an Adaptive Strategy in Iteroparous Life Histories	1	1	0	0	0	0	NA	77
1984	Resource Partitioning within a Single Species Population and Population Stability: A Theoretical Model	2	2	0	0	0	0	NA	32
1984	The Maximum Non-unit Eigenvalue for the Wright-Fisher Model of Random Genetic Drift Incorporating Selection	2	2	0	0	0	0	NA	1
1984	Natural Selection and Population Density-Feedback. I. Population Limitation by Food Shortage, Predation, and Self-Damping Factors	1	1	0	0	0	0	NA	5
1984	Natural Selection and Population Density-Feedback. II. The Evolution of Functional Response Curves	1	1	0	0	0	0	NA	5
1984	Shoot/Root Balance of Plants: Optimal Growth of a System with Many Vegetative Organs	2	2	0	0	0	0	NA	225
1984	Variability in Resource Conumption Rates and the Coexistence of Competing Species	1	1	0	0	0	0	NA	113
1984	Evaluation of Age-Specific Vaccination Strategies	2	2	0	0	0	0	NA	53
1984	Heritable Genetic Variation via Mutation-Selectio nBalance: Lerch's Zeta Meets the Abdominal Bristle	1	1	0	2	2	0	R. Barker, R. Kennedy	516
1984	Interrelationships between the Lotka-Volterra Model and Plant Eco-physiology	2	1	1	0	0	0	NA	4
1984	Evolutionary Dynamics in Frequency-Dependent Two-Phenotype Models	1	1	0	0	0	0	NA	76
1984	Snowshoe Hare Optimal Foraging and Its Implications for Population Dynamics	1	1	0	0	0	0	NA	68
1984	An Alternative to Lotka-Volterra Competition in Coarse-Grained Environments	1	NA	NA	0	0	0	NA	7
1984	The Dynamics of Population Models with Distributed Maturation Periods	3	NA	NA	0	0	0	NA	87
1984	Quantitative Characters under Assortative Mating: Gametic Model	1	NA	NA	0	0	0	NA	3
1984	Theoretical Models of Genetic Map Functions	2	2	0	0	0	0	NA	54
1984	Does K-Selection Imply Prudent Predation?	2	2	0	0	0	0	NA	27
1984	Variable Predators and Switching Behavior	1	1	0	0	0	0	NA	74
1984	Models of Clutch Size in Insect Oviposition	2	NA	NA	0	0	0	NA	239
1984	Evolutionary Stability: States and Strategies	1	1	0	0	0	0	NA	72
1984	Fungal Sclerotium Size Maximizes the Number of Successful Offspring	1	1	0	0	0	0	NA	0
1984	Lines of Descent and the Coalescent	1	1	0	0	0	0	NA	106
1984	The Population Biology of Bacterial Viruses: Why Be Temperate	2	2	0	0	0	0	NA	174
1984	Line-of-Descent and Genealogical Processes, and Their Applications in Population Genetics Models	1	1	0	0	0	0	NA	571
1984	Dispersal Strategies in Patchy Environments	3	3	0	0	0	0	NA	483
1984	A General Version of Optimal Foraging Theory: The Effect of Simultaneous Encounters	2	2	0	0	0	0	NA	91
1984	Theory of Oviposition Strategy of Parasitoids. I. Effect of Mortality and Limited Egg Number	3	NA	NA	0	0	0	NA	318
1984	Evolution and Intraspecific Exploitative Competition. II. A Two-Locus Model for Additive Gene Effects	2	2	0	0	0	0	NA	42
1984	Origin and Evolution of Assortative Mating in Actively Speciating Mole Rates	3	3	0	0	0	0	NA	20
1984	Age-Dependent Predation Is Not a Simplet Process. II. Wolves, Ungulates, and a Discrete Time Model for Predation on Juveniles with a Stabilizing Tail	1	1	0	0	0	0	NA	47
1984	Evolution of Eusociality in Diploid Species	1	1	0	0	0	0	NA	4
1984	Division Synchrony and the Dynamics of Microbial Populations: A Size-Specific Model	3	NA	NA	0	0	0	NA	19
1984	Age-Dependent Models of Population Growth	1	1	0	0	0	0	NA	7
1984	On the Structure and Stability of Mutualistic Systems: Analysis of Predator-Prey and Competition Models as Modified by the Action of a Slow-Growing Mutualist	2	2	0	0	0	0	NA	36
1984	The Effects of Seasonality on Discrete Models of Population Growth	2	2	0	0	0	0	NA	86
1984	The Effect of Skewed Distributions of Vital Statistics on Growth of Age-Structured Populations	2	2	0	0	0	0	NA	16
1984	Delayed Germination of Seeds: Cohen's Model Revisited	1	1	0	0	0	0	NA	146
1984	Insecticides in Host-Parasitoid Interactions	1	1	0	0	0	0	NA	25
1984	Allele Frequencies after a Bottleneck	1	1	0	0	0	0	NA	142
1984	Stability in an Evolutionary Game	2	2	0	0	0	0	NA	99
1985	Environmental Fluctuations and Extinction-Single Species	1	1	0	0	0	0	NA	35
1985	The Role of the Allee Effect in Species Packing	2	NA	NA	0	0	0	NA	86
1985	The Genetic Mating Structure of Subdivided Populations. I. Open-Mating Model	1	1	0	0	0	0	NA	37
1985	The Effect of Environmental Disturbances on the Dynamics of Marine Intertidal Populations	2	1	1	0	0	0	NA	32
1985	A Density Dependent Model of Pheromone Trapping	3	NA	NA	0	0	0	NA	18
1985	Coevolution of Competing Species: Ecological Character Displacement	2	2	0	0	0	0	NA	16
1985	Confidence Intervals for Demographic Projections Based on Products of Random Matrices	2	2	0	0	0	0	NA	117
1985	Mortality and Aging in a Heterogeneous Population: A Stochastic Process Model with Observed and Unobserved Variables	3	3	0	0	0	0	NA	93
1985	Quantitative Models of Hybrid Dysgenesis: Rapid Evolution under Transposition, Extra-chromosomal Inheritance, and Fertility Selection	1	0	1	0	0	0	NA	21
1985	The Effect of Long Time Delays in Predator-Prey Systems	1	1	0	0	0	0	NA	41
1985	The Interaction of Genetic Drift and Mutation with Selection in a Fluctuating Environment	1	1	0	0	0	0	NA	26
1985	Differential Games in Evolutionary Theory: Height Growth Strategies of Trees	1	0	1	0	0	0	NA	57
1985	Selection Component Analysis of Natural Polymorphisms Using Population Samples Including Mother-Offspring Combinations, III	2	2	0	0	0	0	NA	11
1985	The Genetic Divergence of Two Populations	1	1	0	0	0	0	NA	33
1985	Genotype Frequencies Associated with Incompatibility Systems in Tristylous Plants	2	NA	NA	0	0	0	NA	20
1985	Population Dynamics in Variable Environments. VI. Cyclicacl Environments	1	1	0	1	1	0	Pankaj Shah	48
1985	Genetical ESS-Models I. Concepts and Basic Model	1	1	0	0	0	0	NA	30
1985	Genetical ESS-Models II. Multi-strategy Models and Multiple Alleles	1	1	0	0	0	0	NA	28
1985	ESS Germination Strategies in Randomly Varying Environments. I. Logistic-type Models	1	1	0	0	0	0	NA	215
1985	ESS Germination Strategies in Randomly Varying Environments. II. Reciprocal Yield-Law Models	1	1	0	0	0	0	NA	117
1985	Selection in Complex Genetic Systems. VI. Equilibrium Properties of Two Locus Selection Models with Partial Selfing	2	2	0	0	0	0	NA	5
1985	The Role of Recombination in the Modifier Theory of Autosomal Segregation Distortion	1	1	0	0	0	0	NA	13
1985	Fluctuation Periodicity, Generation Separation, and the Expression of Larval Competition	2	NA	NA	0	0	0	NA	144
1985	Population Dynamics in Two-Patch Environments: Some Anomalous Consequences of an Optimal Habitat Distribution	1	1	0	0	0	0	NA	671
1985	Absolute Stability in Predator-Prey Models	1	1	0	0	0	0	NA	16
1985	A General Theory of central Place Foraging for Single-Prey Loaders	2	2	0	0	0	0	NA	96
1985	Coexistence of Competitors in Spatially and Temporally Varying Environments: A Look at the Combined Effects of Different Sorts of Variability	1	1	0	0	0	0	NA	361
1985	A Model for the Dynamics of an Annual Plant Population	2	2	0	0	0	0	NA	24
1985	The Average Frequency of Private Alleles in a Partially Isolated Population	2	2	0	0	0	0	NA	24
1985	Evolutionarily Stable Sets in Mixed-Strategis Models	1	1	0	0	0	0	NA	44
1985	Life History Evolution with Antagonistic Pleiotropy and Overlapping Generations	1	1	0	1	1	0	P.E. Johnston	130
1985	Population Dynamics of Gene Transfer	2	1	1	1	1	0	P.E. Johnston	4
1985	The Use of Sample Genealogies for Studying a Selectively Neutral m-Loci Model with Recombination	2	2	0	0	0	0	NA	76
1986	Multilocus model of sympatric speciation. III. Computer simulations	1	1	0	0	0	0	NA	67
1986	Optimal allocation of energy to growth and reproduction	2	2	0	0	0	0	NA	168
1986	The effects of refuges on predator-prey interactions: A reconsideration	1	1	0	0	0	0	NA	193
1986	Frequency-dependent selection in logistic growth models	2	2	0	0	0	0	NA	11
1986	The relationship between single parent and parent pair genetic likelihoods in genealogy reconstruction	2	1	1	0	0	0	NA	143
1986	Character displacement and niche shift analyzed using consumer-resource models of competition	1	1	0	0	0	0	NA	173
1986	Analysis of linkage disequilibrium in an island model	2	2	0	0	0	0	NA	11
1986	Colony-level selection in the social insects: Single locus additive and nonadditive models	1	NA	NA	0	0	0	NA	61
1986	Dynamics of a metapopulation with space-limited subpopulations	2	2	0	0	0	0	NA	187
1986	Neighborhood models of plant population dynamics. 2. Multi-species models of annuals	1	1	0	0	0	0	NA	160
1986	Linkage disequilibria in finite populations	2	NA	NA	0	0	0	NA	3
1986	Hierarchical selection theory and sex ratios I. General solutions for structured populations	1	1	0	0	0	0	NA	180
1986	The two-sex multiethnic stable population model	1	1	0	0	0	0	NA	12
1986	On the interaction between stabilizing social factors and destabilizing trophic factors in small rodent populations	1	1	0	0	0	0	NA	45
1986	Life not lived due to disequilibrium in heterogeneous age-structured populations	2	2	0	0	0	0	NA	14
1986	Intrachromosomal gene conversion, linkage, and the evolution of multigene families	1	1	0	0	0	0	NA	13
1986	An Evolutionarily Stable Strategy (ESS) model of postcopulatory guarding in insects	1	1	0	0	0	0	NA	56
1986	Distribution of transposable elements in prokaryotes	2	2	0	0	0	0	NA	36
1986	Stable coexistence of synthrophic chains in continuous culture	1	1	0	0	0	0	NA	8
1986	Interference competition, payoff asymmetries, and the social relationships of central place foragers	3	NA	NA	0	0	0	NA	33
1986	The evolutionary advantages of group foraging	2	2	0	0	0	0	NA	559
1986	The fitness functions associated with diapause induction in arthropods I. The effects of age structure	1	1	0	1	1	0	John Spalding	24
1986	The fitness functions associated with diapause induction in arthropods II. The effects of fecundity and survivorship on the optimum	1	1	0	0	0	0	NA	21
1986	A model for fluctuations in the fraction of a bacterial population harboring plasmids	3	3	0	0	0	0	NA	6
1986	Modifiers of mutation rate: A general reduction principle	2	2	0	0	0	0	NA	95
1986	Traveling periodic waves in heterogeneous environments	3	NA	NA	0	0	0	NA	316
1986	The distribution of homozygosity for four alleles	1	NA	NA	0	0	0	NA	0
1986	Competition and body size	2	2	0	0	0	0	NA	127
1986	Private alleles in a partially isolated population II. Distribution of persistence time and probability of emigration	2	2	0	0	0	0	NA	3
1986	Interspecific competition among metapopulations with space-limited subpopulations	2	2	0	0	0	0	NA	95
1986	Models for clutch size and sex ratio with sibling interaction	1	NA	NA	0	0	0	NA	80
1986	The interdependence of mating structure and inbreeding depression	1	NA	NA	0	0	0	NA	104
1986	Invasion and coexistence of two phenotypically variable species	1	1	0	0	0	0	NA	4
1986	Partition structures, Polya urns, the Ewens sampling formula, and the ages of alleles	1	1	0	0	0	0	NA	116
1986	Oscillatory population growth in periodic environments	1	NA	NA	0	0	0	NA	47
1986	Natural selection, fitness entropy, and the dynamics of coevolution	1	1	0	0	0	0	NA	3
1986	A general reduction principle for genetic modifiers of recombination	1	1	0	0	0	0	NA	44
1986	Imitator strategies	2	NA	NA	0	0	0	NA	4
1986	A resolution of the ascertainment sampling problem I. Theory	1	1	0	0	0	0	NA	113
1987	Prey refuges and predator-prey stability	1	1	0	0	0	0	NA	275
1987	Learning to forage in a regenerating patchy environment: Can it fail to be optimal?	1	NA	NA	0	0	0	NA	28
1987	Evolution and intraspecific competition. III. One-locus theory for small additive gene effects and multidimensional resource qualities	2	2	0	0	0	0	NA	23
1987	Individual and population sex allocation patterns	1	1	0	0	0	0	NA	147
1987	Selection in plant populations of effectively infinite size VI. Overlapping generations	1	NA	NA	0	0	0	NA	7
1987	Selection caused by self-fertilization I. Four measures of self-fertilization and their effects on fitness	3	NA	NA	0	0	0	NA	26
1987	The evolution of habitat preference II. Evolutionary genetic stability under soft selection	2	1	1	0	0	0	NA	19
1987	A theory for the evolutionary game	2	2	0	0	0	0	NA	147
1987	Starvation risk and flock size of the social forager: When there is a flocking cost	2	2	0	0	0	0	NA	64
1987	On the divergence of genes in multigene families	2	2	0	0	0	0	NA	14
1987	Evolutionary Stable Strategies: A review of basic theory	1	NA	NA	0	0	0	NA	194
1987	Dynamics and stability in coevolutionary ecological systems I. Community stability and coevolutionarily stable states	3	NA	NA	0	0	0	NA	4
1987	Dynamics of populations with changing rates: Generalization of the stable population theory	1	1	0	0	0	0	NA	16
1987	Reduction of neutral gene flow due to the partial sterility of heterozygotes for a linked chromosome mutation	4	2	2	1	1	0	Mr. P Mancini	5
1987	The role of recombination and selection in the modifier theory of sex-ratio distortion	1	1	0	0	0	0	NA	10
1987	Neighborhood models of plant population dynamics 3. Models with spatial heterogeneity in the physical environment	1	1	0	0	0	0	NA	81
1987	The dynamics of predation and competition in patchy environments	2	2	0	0	0	0	NA	45
1987	An evolutionary epidemiological mechanism, with applications to type a influenza	1	1	0	0	0	0	NA	100
1987	Optimal pursuit times: How long should predators pursue their prey?	3	3	0	0	0	0	NA	19
1987	Speciation and the _shifting balanceÓ in a continuous population	2	2	0	0	0	0	NA	58
1987	The _battle of the sexesÓ: A genetic model with limit cycle behavior	2	2	0	0	0	0	NA	30
1987	On economically tracking a variable environment	1	1	0	0	0	0	NA	166
1987	Cycles in nonlinear age-structured models I. Renewal equations	1	1	0	0	0	0	NA	35
1987	The average number of sites separating DNA sequences drawn from a subdivided population	1	1	0	0	0	0	NA	105
1987	The nonlinearity of competitive effects in models of competition for essential resources	1	1	0	0	0	0	NA	26
1987	Polymorphism from environmental heterogeneity: Some features of genetically induced niche preference	1	0	1	0	0	0	NA	24
1987	Models for pest control: Complementary effects of periodic releases of sterile pests and parasitoids	1	1	0	0	0	0	NA	49
1987	Genotypic distribution at the limits to natural and artificial selection with mutation	1	1	0	0	0	0	NA	10
1987	Life history tactics of annual organisms: The joint effects of dispersal and delayed germination	4	4	0	0	0	0	NA	107
1987	The two-sex problem with persistent unions: A generalization of the birth matrix-mating rule model	1	1	0	0	0	0	NA	33
1987	Obligate mutualism with a predator: Stability and persistence of three-species models	3	3	0	0	0	0	NA	29
1987	The functional responses of adaptive consumers of two resources	1	1	0	0	0	0	NA	109
1987	The reduction of gene exchange due to a prezygotic isolating mechanism with monogenic inheritance	1	1	0	0	0	0	NA	11
1987	Competition and niche dynamics from steady-state solutions of dispersal equations	1	NA	NA	0	0	0	NA	7
1987	Some two locus models for the evolution of sex-determining mechanisms	1	1	0	0	0	0	NA	14
1987	The genetic divergence of three populations	1	1	0	0	0	0	NA	10
1987	Quantitative genetic variation in an ecological setting	2	2	0	0	0	0	NA	13
1987	A reconciliation of simple and complex models of age-dependent predation	1	1	0	0	0	0	NA	24
1987	Antibiotic exposure and resistance in mixed bacterial populations	1	1	0	0	0	0	NA	9
1987	Competition for space: Effects of disturbance and indeterminate competitive success	1	1	0	0	0	0	NA	20
1987	The dynamics of multispecies, multi-life-stage models of aquatic food webs	2	2	0	0	0	0	NA	94
1987	Prey-predator cycles and lags in space: Descriptive models from a laboratory experiment	2	2	0	1	NA	NA	T. Roeder	10
1987	Further thoughts on competition for essential resources	1	1	0	0	0	0	NA	12
1988	Population dynamics of mosquito-borne disease: Persistence in a completely heterogeneous environment	2	2	0	0	0	0	NA	116
1988	Factors influencing the optimum sex ratio in a structured population	2	2	0	0	0	0	NA	123
1988	Stochasticity in invertebrate clutch-size models	2	2	0	0	0	0	NA	25
1988	Variances and covariances of squared linkage disequilibria in finite populations	2	2	0	0	0	0	NA	216
1988	Emergence patterns in male checkerspot butterflies: Testing theory in the field	3	3	0	0	0	0	NA	29
1988	A model of resource renewal and depletion: Applications to the distribution and abundance of nectar in flowers	1	1	0	0	0	0	NA	19
1988	How should resources be counted?	1	1	0	0	0	0	NA	52
1988	Seasonal control for an endemic disease with seasonal fluctuations	1	1	0	0	0	0	NA	10
1988	The population dynamics of two vertically transmitted infections	2	2	0	0	0	0	NA	39
1988	Competition in safe-sites	4	4	0	0	0	0	NA	30
1988	Allelic frequencies given the sample's common ancestral type	1	NA	NA	0	0	0	NA	5
1988	The demographic meanings of the classical population growth models of ecology	3	2	1	0	0	0	NA	22
1988	The influence of spatial inhomogeneities on neutral models of geographical variation: II. The semi-infinite linear habitat	2	2	0	0	0	0	NA	13
1988	The influence of spatial inhomogeneities on neutral models of geographical variation: I. Formulation	1	1	0	0	0	0	NA	22
1988	The effect of the reproductive system on mutation load	3	3	0	0	0	0	NA	29
1988	Oscillations and chaos in epidemics: A nonlinear dynamic study of six childhood diseases in Copenhagen, Denmark	3	NA	NA	0	0	0	NA	204
1988	Analytical threshold and stability results on age-structured epidemic models with vaccination	1	1	0	0	0	0	NA	47
1988	On the evolution of genetic incompatibility systems. III. Introduction of weak gametophytic self-incompatibility under partial inbreeding	1	0	1	2	1	1	Shiang-Tai Tuan, Susan Paulsen	23
1988	Hermaphroditic sex allocation with overlapping generations	1	1	0	0	0	0	NA	16
1988	Regular systems of inbreeding with mutation	1	1	0	0	0	0	NA	3
1988	Processes of pair formation leading to assortative mating in biological populations: Dynamic interaction model	1	NA	NA	0	0	0	NA	22
1988	Coexistence of an unlimited number of algal species in a model system	1	NA	NA	0	0	0	NA	67
1988	Models of growth with density regulation in more than one life stage	1	1	0	0	0	0	NA	34
1988	A general asymptotic property of two-locus selection models	2	2	0	0	0	0	NA	22
1988	Inclusive fitness models with two sexes	1	1	0	0	0	0	NA	111
1988	Determinants of local population size in patchy habitats	2	NA	NA	0	0	0	NA	173
1988	Overall population stability despite local extinction: The stabilizing influence of prey dispersal from predator-invaded patches	2	2	0	0	0	0	NA	51
1988	Gradual transition from vegetative to reproductive growth is optimal when the maximum rate of reproductive growth is limited	2	2	0	0	0	0	NA	35
1988	The genetic-mating structure of subdivided populations II. Correlated mating models	1	1	0	0	0	0	NA	25
1988	Frequency- and density-dependent selection: The two-phenotype model	1	1	0	0	0	0	NA	13
1988	Estimating divergence times	1	1	0	0	0	0	NA	6
1988	Parameter evolution in a laboratory insect population	4	NA	NA	0	0	0	NA	51
1988	Optimal resource allocation in perennial plants: A continuous-time model	1	1	0	0	0	0	NA	35
1988	On the evolution of genetic incompatibility systems. IV. Modification of response to an existing antigen polymorphism under partial selfing	1	0	1	0	0	0	NA	11
1988	On the role of patch density and patch variability in central-place foraging	1	1	0	0	0	0	NA	5
1988	Demographic framework for parasitoid mass rearing: Case study of Biosteres tryoni, a larval parasitoid of tephritid fruit flies	3	3	0	0	0	0	NA	20
1989	Population dynamics of systems with consumers that maintain a constant ratio of intake rates of two resources	2	2	0	0	0	0	NA	31
1989	Postcopulatory guarding strategy in a finite mating period	2	2	0	0	0	0	NA	29
1989	The estimation of concurrent multiple paternity probabilities in natural populations	2	1	1	0	0	0	NA	12
1989	Multivariate measures of similarity and niche overlap	1	1	0	0	0	0	NA	36
1989	The effect on genetic sampling distributions of correlations in reproduction	2	2	0	0	0	0	NA	3
1989	Pleiotropy and preadaptation in the evolution of human language capacity	2	2	0	0	0	0	NA	34
1989	Allele frequencies in multigene families I. Diffusion equation approach	1	NA	NA	0	0	0	NA	13
1989	More on recombination and selection in the modifier theory of sex-ratio distortion	2	1	1	0	0	0	NA	22
1989	The propagation of uncertainty in human mortality processes operating in stochastic environments	3	3	0	0	0	0	NA	9
1989	Structural instability of models of sexual selection	1	1	0	0	0	0	NA	48
1989	Allele frequencies in multigene families II. Coalescent approach	1	NA	NA	0	0	0	NA	14
1989	An uncertain life: Demography in random environments	1	1	0	0	0	0	NA	252
1989	Neutral gene flow in the presence of a selected gene with random or assortative mating	1	1	0	0	0	0	NA	2
1989	Linkage equilibrium in multi-locus genotypic frequencies with mixed selfing and random mating	1	1	0	0	0	0	NA	12
1989	The multiple-locus symmetric fertility model	1	1	0	0	0	0	NA	6
1989	Ecogenetic models, competition, and heteropatry	2	2	0	1	1	0	James Bradley	26
1989	How often are polymorphic restriction sites due to a single mutation?	1	1	0	0	0	0	NA	32
1989	Homozygosity of selected alleles in subdivided populations	2	1	1	0	0	0	NA	0
1989	Stability and harvesting of competing populations with genetic variation in life history strategy	2	2	1	0	0	0	NA	41
1989	Dynamics of an age-structured prey with density- and predation-dependent recruitment: The Dungeness crab and a nemertean egg predator worm	2	2	1	0	0	0	NA	17
1989	An interpretation and proof of the fundamental theorem of natural selection	1	1	1	0	0	0	NA	192
1989	Evolutionary stability in the repeated prisoner's dilemma	2	2	0	0	0	0	NA	108
1989	Estimating the initial relative infection rate for a stochastic epidemic model	1	1	0	0	0	0	NA	25
1989	Disease regulation of age-structured host populations	1	1	0	0	0	0	NA	51
1989	Foraging in complex environments: When prey availability varies over time and space	3	3	0	0	0	0	NA	52
1989	Evolutionary stability in one-parameter models under weak selection	1	1	0	0	0	0	NA	278
1989	Coexistence of temporally segregated competitors in a cyclic environment	1	1	0	0	0	0	NA	24
1989	Direct and indirect effects of invasions of predators on a multiple-species community	3	2	1	0	0	0	NA	8
1989	Age-specific optimal diets and optimal foraging tactics: A life-historic approach	2	2	0	0	0	0	NA	18
1989	On the evolution of genetic incompatibility systems. V. Origin of sporophytic self-incompatibility in response to overdominance in viability	1	1	0	0	0	0	NA	17
1989	Central place foraging theory: When load size affects travel time	1	1	0	0	0	0	NA	29
1989	The effect of uncertainty on the relationship between the frequency of warning signals and prey density	1	1	0	0	0	0	NA	3
1989	Diffusion analysis and stationary distribution of the two-species lottery competition model	2	2	0	0	0	0	NA	25
1989	Metastability, a consequence of stochastics in multiple stable population dynamics	1	1	0	0	0	0	NA	11
1990	Spatial Subdivsion of Populations and Estimates of Genetic Variation	1	1	0	0	0	0	NA	27
1990	MacArthurs Consumer-Resource Model	1	1	0	0	0	0	NA	83
1990	The Number of Alleles in Multigene Families	2	NA	NA	0	0	0	NA	10
1990	Simplified Models for Viability Selection at Multiple Loci	1	1	0	0	0	0	NA	6
1990	Identifiaability in Hazard Models with Unobserved Heterogeneity: The Compatability of Two Apparently Contradictory Results	1	0	1	0	0	0	NA	19
1990	Models and Approximations for Random Genetic Drift	1	1	0	0	0	0	NA	28
1990	Diffuse Coevolution in Plant-Herbivore Communities	3	3	0	0	0	0	NA	33
1990	Long-Term Response to Artificial Selection with Multiple Alleles- Study by Simulations	2	2	0	0	0	0	NA	11
1990	Evolutionary Stability: One Concept, Several Meanings	1	1	0	0	0	0	NA	83
1990	The Variance of Sample Heterozygosity	3	3	0	0	0	0	NA	26
1990	Some Models of Neutral Evoluation Compensatory Evolution, and the Shifting Balance Process	1	1	0	0	0	0	NA	38
1990	How Gene Families Evolve	1	0	1	0	0	0	NA	51
1990	A Stochastic Theory of Community Food Webs. VI. Heterogenous Alternatives to the Cascade Model	1	1	0	0	0	0	NA	47
1990	Levels of Multiallelic Overdominance Fitness, Heterozygote Excess and Heterozygote Deficiency	1	1	0	0	0	0	NA	3
1990	Relatives Risks: Frailty Models of Life History Data	1	1	0	0	0	0	NA	100
1990	Forest-Pest Interaction Dynamics: The Simplest Mathematical Models	3	NA	NA	0	0	0	NA	45
1990	Mutation Modification with Multiplicative fertility Selection	2	2	0	0	0	0	NA	11
1990	Intraspecific Competition and Components of Niche Width in Age Structured Populations	3	3	0	0	0	0	NA	4
1990	Chaos, Noise, and Extinction in Models of Population Growth	2	2	0	0	0	0	NA	64
1990	Endemic Disease in Host Populations with Fully Specified Demography	1	0	1	0	0	0	NA	13
1990	Population Growth in a Time-Varying Environment	1	1	0	0	0	0	NA	22
1990	Generalized Linear Modeling Methods for Selection Component Experiments	3	3	0	0	0	0	NA	15
1990	Dynamics of African ungulate Populations with Fluctuating, Densities-independent Calf Survival	1	1	0	0	0	0	NA	10
1990	A General Minimum Principle for Compting Populations: Some Ecological and Evolutionary Consequences	1	1	0	0	0	0	NA	11
1990	More on selection for and against recombination	2	2	0	0	0	0	NA	55
1990	Dynamics of Polygenic Characters under Selection	2	2	0	0	0	0	NA	152
1990	The Reduction of Neutral Gene Flow Caused by a Selected Gene in Plant Population Models	1	1	0	1	1	0	Mr. G. Baglioni	2
1990	Stochastic Strategies in the Prisoners Dilema	1	1	0	0	0	0	NA	111
1990	Multiple Attractors in the Response to a Vaccination Program	1	0	1	0	0	0	NA	33
1990	Towards a Unified Theory of Molecular Evolution	1	1	0	0	0	0	NA	5
1990	Evolution of the Segregation Ratio: Modification of Gene Conversion and Meiotic Drive	2	1	1	0	0	0	NA	11
1990	Outbreaks and Oscillations in a Temperature-dependent Model for a Mite Predator-prey Interaction	3	3	0	0	0	0	NA	8
1990	Effect of Gene Conversion on Variances of Digenic Identity Measures	2	2	0	0	0	0	NA	3
1990	Stochastic Evolutionary Game Dynamics	2	2	0	0	0	0	NA	988
1990	Coexistence of Any Number of Species in the Lotka-Volterra Competitive System over Two-Patches	1	1	0	0	0	0	NA	81
1990	Genealogy of Neutral Genes in Two Partially Isolated Populations	2	2	0	0	0	0	NA	77
1990	Evolution of Sexual Preferences in Quantitative Characters	2	2	0	0	0	0	NA	4
1990	Fundamental Theorem of Natural Selection in Biocultural Populations	1	1	0	0	0	0	NA	9
1990	Maximum Likelihood Estimators for Incorrect Models with an Application to scertain Bias for Continous Characters	1	1	0	0	0	0	NA	10
1990	Recollections of Whittingehame Lodge	1	1	0	0	0	0	NA	6
1990	Fisher's Contributions to the Theory of Sexual Selection as the Basis of Recent research	1	1	0	0	0	0	NA	8
1990	Fisher's Contributions to Genetics and Evolution	1	1	0	0	0	0	NA	16
1990	Fisher, W, and the Fundamental Theorem	1	1	0	0	0	0	NA	17
		1246	1059	80	46	25	19
			502	38
			557	42
